# Supplementary material
Source: PubMed Central journal article supplement (PMC9492633)
Supplement: NIHMS1820979-supplement-1.pdf [file NIHMS1820979-supplement-1.pdf]

SUPPLEMENTAL DATA

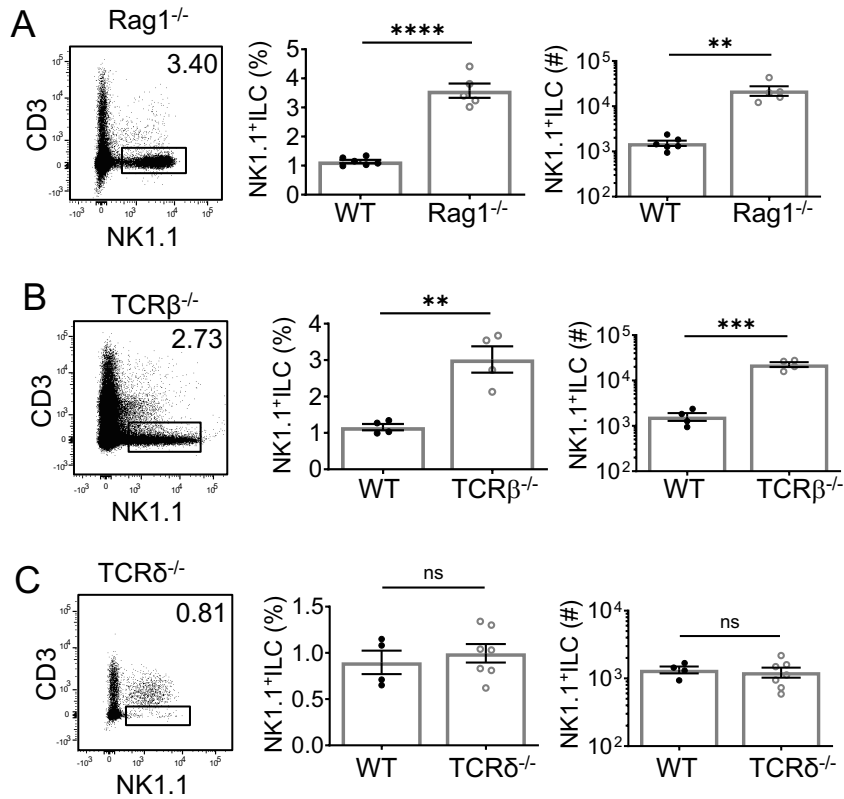

**Supplemental Figure 1. Presence of T cells suppresses generation of CCR10<sup>+</sup> NK1.1<sup>+</sup> ILC1s**

**in adult thymi. A, B, C** Flow cytometric (FC) analysis of CD3<sup>-</sup>NK1.1<sup>+</sup> cells in thymocytes of adult Rag1<sup>-/-</sup>CCR10<sup>+/EGFP</sup> (A), TCRβ<sup>-/-</sup>CCR10<sup>+/EGFP</sup> (B) and TCRδ<sup>-/-</sup>CCR10<sup>+/EGFP</sup> (C) mice.

Average percentages and number of CD3<sup>-</sup>NK1.1<sup>+</sup> thymocytes were showed in bar graphs in comparison to their WT controls. CD3<sup>-</sup>NK1.1<sup>+</sup> cells are gated from CD4<sup>-</sup>CD8<sup>-</sup> thymocytes.

Results are representative of two or three independent experiments. ns = not significant, \*\*p <

0.01, \*\*\*p < 0.001, \*\*\*\*p < 0.0001 as determined by two-tailed Student's t test.

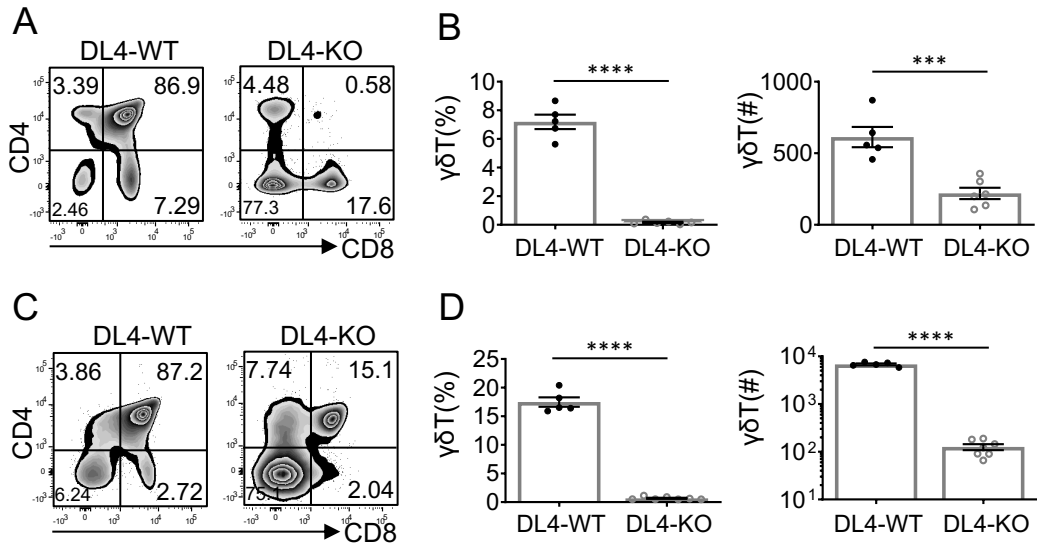

**Supplemental Figure 2. Impaired  $\alpha\beta$ T and  $\gamma\delta$ T cell differentiation in DL4-KO thymi. A)**

FC analysis of thymocytes for expression of CD4 and CD8 in adult DL4-WT (DL4<sup>f/f</sup> CCR10<sup>+EGFP</sup>) and DL4-KO (FoxN1<sup>Cre</sup>DL4<sup>f/f</sup>CCR10<sup>+EGFP</sup>) mice. **B)** Comparison of the

percentage and number of thymic  $\gamma\delta$ T cells in adult DL4-WT and DL4-KO mice. **C)** FC analysis of thymocytes for expression of CD4 and CD8 in newborn adult DL4-WT and DL4-KO mice.

**D)** Comparison of the percentage and number of thymic  $\gamma\delta$ T cells in newborn DL4-WT and

DL4-KO mice. Results are of three independent experiments. ns = not significant and \*p < 0.05,

\*\*\*p < 0.001, \*\*\*\*p < 0.0001 as determined by two-tailed Student's t test.

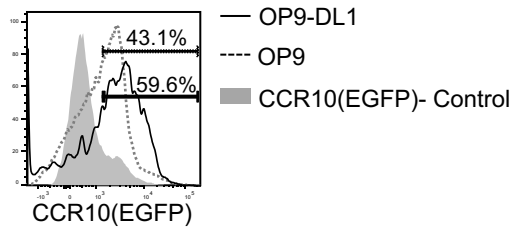

**Supplemental Figure 3. Differentiation of CCR10<sup>-</sup> CD3<sup>-</sup> NK1.1<sup>+</sup> thymocytes into CCR10<sup>+</sup> CD3<sup>-</sup> NK1.1<sup>+</sup> cells in the OP9-DL1 culture.** FC analysis of the expression of CCR10(EGFP) on gated CD45<sup>+</sup>CD3<sup>-</sup>NK1.1<sup>+</sup> cells generated from the *in vitro* co-culture of purified CCR10(EGFP)<sup>-</sup> CD3<sup>-</sup>CD4<sup>-</sup>CD8<sup>-</sup> NK1.1<sup>+</sup> thymocytes with OP9 (dotted line) or OP9-DL1 (solid line) cells for 19 days. The CCR10(EGFP) histogram of CCR10<sup>+/+</sup> cells (gray area) serves as a negative control for EGFP. Representative of three experiments.

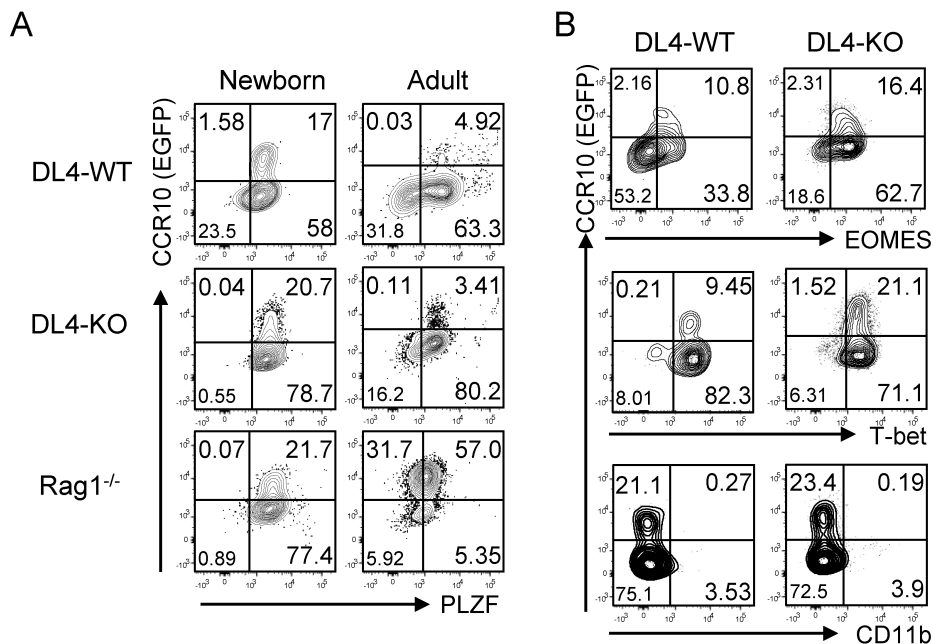

**Supplemental Figure 4. Analysis of CD103 and PLZF expression on CCR10<sup>-</sup> and CCR10<sup>+</sup> thymic NK1.1<sup>+</sup> ILC1s of DL4-KO mice. A)** Comparison of the PLZF expression on CCR10<sup>-</sup> and CCR10<sup>+</sup> CD3<sup>-</sup>NK1.1<sup>+</sup> thymocytes in adult and newborn DL4-WT (DL4<sup>f/f</sup> CCR10<sup>+/EGFP</sup>), DL4-KO (Foxn1<sup>Cre</sup>DL4<sup>f/f</sup> CCR10<sup>+/EGFP</sup>) and Rag1<sup>-/-</sup>CCR10<sup>+/EGFP</sup> mice. **B)** FC analysis of expression of EOMES, T-bet and CD11b in thymic NK1.1<sup>+</sup> ILC1s of newborn DL4-WT and DL4-KO mice.
